# Supplementary material for: In situ construction of surface oxygen vacancies on N/TiO2 for promoting visible light photocatalytic H2 evolution
Source: Royal Society of Chemistry journal article supplement (doi:10.1039/d4tc03098b), 2024-01-01
Supplement: d4tc03098b1.pdf [file d4tc03098b1.pdf]

## 1 **Supporting Information**

### 2 **In situ construction of surface oxygen vacancies on N/ TiO<sub>2</sub>** 3 **for promoting visible-light photocatalytic H<sub>2</sub> evolution**

4 Yuandong Shen <sup>a, 1</sup>, Nan Yang <sup>a</sup>, Ke Wang <sup>a</sup>, Bin Xiao <sup>a, \*</sup>, Yijun He <sup>a</sup>, Zhishi Qiu <sup>a</sup>,  
5 Tong Zhou <sup>a</sup>, Weijie Zhan <sup>a</sup>, Rui Hu <sup>a</sup>, Genlin Zhang <sup>a, \*</sup>, Jin Zhang <sup>a</sup>, Zhongqi Zhu <sup>a</sup>,  
6 Feng Liu <sup>b</sup>, Hao Cui <sup>b</sup>, Qingju Liu <sup>a, \*</sup>

7 <sup>a</sup> Yunnan Key Laboratory for Micro/Nano Materials & Technology, National Center  
8 for International Research on Photoelectric and Energy Materials, School of  
9 Materials and Energy, Yunnan University, Kunming, 650091, P. R. China.

10 <sup>b</sup> Yunnan Precious Metals Laboratory Co., Ltd., Kunming, 650106, P. R. China.

11 \* Corresponding author: Prof. Qingju Liu, E-mail: qjliu@ynu.edu.cn; Genlin Zhang, E-  
12 mail: zhanggenlin@ynu.edu.cn; Bin Xiao, E-mail: ynuxb2011@163.com

## 1 **Experimental Section**

### 2 **Photocatalysts Preparation**

#### 3 **Preparation of NH<sub>2</sub>-MIL-125(Ti)**

4 The preparation of NH<sub>2</sub>-MIL-125(Ti) was mainly based on the study of Cheng et al. <sup>1</sup>.  
5 36 mL of N,N-Dimethylformamide (DMF) and 4 mL of methanol (MeOH) were  
6 successively added to the beaker. After mixed well, 1.385 g of 2-Aminoterephthalic  
7 Acid (NH<sub>2</sub>-BDC) was added during stirring. After it was completely dissolved, 2.21  
8 mL of acetic acid (AA) was added dropwise and mixed well, followed by a slow drop  
9 of 1.185 mL of Titanium(IV) isopropoxide (TPOT). The mixture was ultrasonicated for  
10 10 min and stirred for 2 h, then transferred to a 100 mL reactor and hydrothermally  
11 reacted for 24 h at 150 °C. The reaction was completed to obtain a yellow precipitate,  
12 which was washed three times with DMF and methanol, respectively. Finally, it was  
13 vacuum dried at 80 °C for 5 h to obtain the octahedral type NH<sub>2</sub>-MIL-125(Ti).

#### 14 **Preparation of N-doped TiO<sub>2</sub> and X-N/TiO<sub>2</sub>**

15 According to the research of Gao et al. <sup>2</sup>, N-doped TiO<sub>2</sub> (N/TiO<sub>2</sub>) can be prepared by  
16 direct sintering of NH<sub>2</sub>-MIL-125(Ti). Therefore, we increased the prepared NH<sub>2</sub>-MIL-  
17 125(Ti) at an elevated temperature rate of 2 °C/min to 550 °C and held it for 6 h. The  
18 product was named N/TiO<sub>2</sub>. We then constructed oxygen vacancies in situ on the  
19 surface of N/TiO<sub>2</sub>. Firstly, thiourea with a mass ratio of X to NH<sub>2</sub>-MIL-125(Ti) was  
20 taken into a beaker and 15 mL of deionized water was added for dissolution (X is 0.8,  
21 1, 1.2, 1.4, 1.6). Secondly, 200 mg of the prepared NH<sub>2</sub>-MIL-125(Ti) was added to the  
22 above thiourea solution, sonicated for 10 min and then evaporated to dryness in a 60 °C  
23 water bath with stirring. Thirdly, the obtained powder was evenly ground, transferred  
24 to a crucible and calcined at 550 °C for 6 h in air at an elevated temperature rate of 2  
25 °C/min. Finally, the resulting powder was washed three times with deionized water and  
26 vacuum dried at 60 °C for 5 h to obtain N-doped TiO<sub>2</sub> with surface oxygen vacancies.

1 The samples were named X-N/TiO<sub>2</sub> based on the different ratios of thiourea to NH<sub>2</sub>-  
2 MIL-125(Ti). Pure anatase TiO<sub>2</sub> was prepared using a patented method previously  
3 developed by our group<sup>3,4</sup>. Under the condition of 60 °C water bath, 5 mL of tetrabutyl  
4 titanate was slowly dropped into a mixed solution of 75 mL of deionized water and 3  
5 mL of hydrolysis inhibitor. Adjusted the pH of the solution to 2-3 and stirred for 6-8 h  
6 until the turbid solution became transparent and clear. After drying at 60 °C, the  
7 obtained powder was calcined at 400 °C for 2 h. Finally, the obtained powder was  
8 ground to obtain pure TiO<sub>2</sub>.

## 9 **Characterization**

10 The X-ray diffraction pattern (XRD) was obtained by Cu-K $\alpha$  radiation on the X-ray  
11 diffractometer (TTRIII Rigaku, Japan) to determine the phase structure of the sample  
12 (the accelerating voltage and applied current were 40 kV and 80 mA, respectively). The  
13 microstructure of the sample was observed by transmission electron microscope (TEM,  
14 JEM-2100). X-ray photoelectron spectroscopy (XPS) was measured by a photoelectron  
15 spectrometer (Thermo ESCALAB 250Xi, USA) with an Al K $\alpha$  radiation source (hv  
16 =1486.6 eV). The full spectrum scanning energy was 100 eV with a step size of 1 eV,  
17 and the fine spectrum scanning energy was 50 eV with a step size of 0.1 eV. The binding  
18 energy was corrected by surface contamination C 1s (284.8 eV). Ti K-edge XAS spectra  
19 were collected on the RapidXAFS 2 M (Anhui Absorption Spectroscopy Analysis  
20 Instrument Co., Ltd., China). The UV-Vis diffuse reflectance spectra were obtained via  
21 the diffuse reflectance spectra (DRS) measured on the ultraviolet-visible  
22 spectrophotometer (Shimadzu, UV-2600, Japan). Steady-state photoluminescence (PL)  
23 was obtained by direct detection of powder samples with a fluorescence spectrometer  
24 (FL4500, Shimadzu, Japan) with an excitation wavelength of 375 nm. The lifetime of  
25 photogenerated carriers for the sample was obtained by time-resolved fluorescence  
26 decay (TRPL) spectroscopy (FLS1000, UK). Electron paramagnetic resonance (EPR)  
27 spectroscopy was carried out on Bruker ESR5000 (Bruker BioSpin GmbH, Germany).  
28 Under the condition of the same test parameters (9.4548 GHz, 10 dB), mass (20 mg)

1 and argon (Replace the air in the glass tube containing the sample with high-purity  
2 argon gas 20 times), the unpaired electrons in the powder samples were detected by  
3 EPR at room temperature. The in situ EPR test conditions were consistent with the  
4 above. Specifically, after testing the conventional EPR of the sample, the glass tube  
5 containing the sample was then irradiated under a 300 W xenon lamp for 30 min and  
6 tested again.

## 7 **Evaluation of Catalytic Performance**

8 The photocatalytic water-splitting experiments were carried out on a multi-channel  
9 photochemical reaction test system with a 5 W LED lamp (PCX-50C Discover, Perfect  
10 Light Ltd.). Under magnetic stirring, 5 mg catalyst was uniformly dispersed in a closed  
11 reaction bottle containing a mixture of 30 mL water and methanol (H<sub>2</sub>O: methanol =  
12 3:1, reactor volume is 50 mL). Then the air in the reaction bottle was replaced with high-  
13 purity argon 20 times under stirring, and the pressure was adjusted to 30 kPa. Finally,  
14 the reaction bottle was installed on PCX-50C Discover for testing, and the test  
15 temperature was kept at 40 °C. The cycle stability test was also carried out under the  
16 same condition. Considering the accelerated volatilization of methanol in vacuum and  
17 this temperature, methanol was replenished after each cycle (3 hours) to the same level  
18 as the first cycle to ensure that the experimental conditions are the same in each cycle.  
19 And then, repeat the above operation until the end of the cycle test. The apparent  
20 quantum efficiency (AQE) was measured on the same test system and the same  
21 condition.

22 AQE is calculated from the hydrogen production rate obtained from formula (1) <sup>5</sup>  
23 and single-wavelength LED lamp (PCX-50C, 5 W). The wavelengths of  
24 monochromatic light are 365 nm, 385 nm, 400nm and 420 nm, respectively. The  
25 corresponding light intensity are 116.9 mW/cm<sup>2</sup>, 147.6 mW/cm<sup>2</sup>, 72.1 mW/cm<sup>2</sup> and  
26 51.4 mW/cm<sup>2</sup>, respectively.

$$27 \quad AQE = \frac{2MN_Ahc}{AIt\lambda} \times 100\% \quad (1)$$

1 where  $M$  is the molar amount of hydrogen,  $N_A$  is the Avogadro's constant,  $h$  is the  
2 Planck constant,  $c$  is the speed of light,  $I$  is the intensity of light,  $A$  is the irradiation  
3 area,  $t$  is the reaction time, and  $\lambda$  is the wavelength of light.

#### 4 **Photo-electrochemical Measurements**

5 The sample (2 mg) was added to the mixed solution of 0.5 mL ethanol and 20  $\mu$ L Nafion  
6 solution (5 wt%). The prepared samples were uniformly coated on indium-tin-oxide  
7 (ITO) slides (2.0 cm  $\times$  2.0 cm) and dried at 60  $^{\circ}$ C for 1 h to prepare working electrodes.  
8 The photo-electrochemical properties of the electrodes were measured by CHI-760E  
9 electrochemical workstation in a three-electrode system. Pt electrode and Ag/AgCl  
10 electrode were used as auxiliary electrode and reference electrode, respectively. The  
11 electrolyte was 0.2 M of Na<sub>2</sub>SO<sub>4</sub> aqueous solution and the Xe-lamp was 150 W. The  
12 photocurrent of the electrodes was measured using the amperometric (I-t curve)  
13 technique under repeatedly interrupted light irradiation. Electrochemical impedance  
14 spectroscopy (EIS) measurements were carried out under the applied voltage of 5.0  
15 mV, and the frequency range was 10<sup>5</sup>-0.1 Hz.

#### 16 **Computational Details**

17 In this work, the Vienna Ab initio simulation package (VASP) was used for density  
18 flood theory (DFT) calculations. The Perdew-Burke-Erzenhoff (PBE) <sup>6</sup> of generalized  
19 gradient approximation (GGA) <sup>7</sup> function is employed for the treatment of exchange-  
20 correlation interactions. The projection-enhanced wave (PAW) <sup>8</sup> potential is used to  
21 characterize the interaction between valence electrons and nuclei. 2 $\times$ 2 $\times$ 1 gamma-  
22 centered Monkhorst-Parker k-point grid is used for Brillouin zone integration <sup>9</sup>.  
23 DFT+U (U-J=7.8-1) for Ti atoms is used to solve the underestimated TiO<sub>2</sub> band gap  
24 and correct the interaction between atoms. For the energy received by the atom and the  
25 convergence of the force are set to 1 $\times$ 10<sup>-5</sup> eV and 0.05 eV/ $\text{\AA}$ , respectively. According  
26 to XRD patterns, we conducted (101) section of anatase TiO<sub>2</sub> to construct 44 atoms in  
27 4 O-Ti-O atomic layers. To better simulate the real environment, we fixed the bottom

1 two atomic layers, a total of 72 atoms. The lattice parameters of  $\text{TiO}_2$  (101) are  $a=10.21$   
2  $\text{\AA}$  and  $b=11.33 \text{\AA}$ , respectively. The lattice length in the z-direction was set to be  $27.86$   
3  $\text{\AA}$  to ensure that there was sufficient vacuum thickness between the slabs.  
4 The effect of the active site on the hydrogen evolution performance of the  $\text{TiO}_2$   
5 system was investigated by calculating the corresponding Gibbs free energy. All  
6 calculations are based on the computational hydrogen electrode (CHE) proposed by  
7 Nørskov et al<sup>10</sup>. The Gibbs free energy of the proton and electron pair ( $\text{h}^+ + \text{e}^-$ ) is equal  
8 to half of the free energy of gaseous hydrogen ( $\text{H}_2$ ). In addition, the free energy of the  
9 H atom is corrected at 298.15 K. Finally, VASPKIT<sup>11</sup> was used to post-process the  
10 computational results.

11

## 1 Supporting Figures

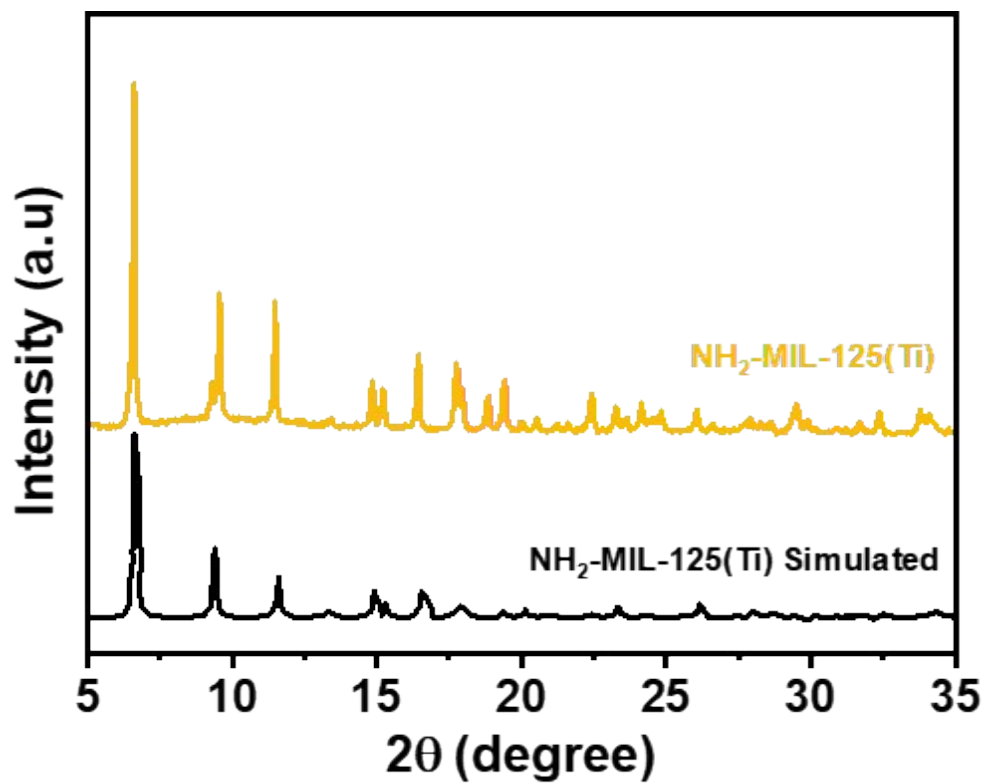

2

3 Figure S1. XRD patterns of as-synthesized NH<sub>2</sub>-MIL-125(Ti) and simulated NH<sub>2</sub>-  
4 MIL-125(Ti).

5

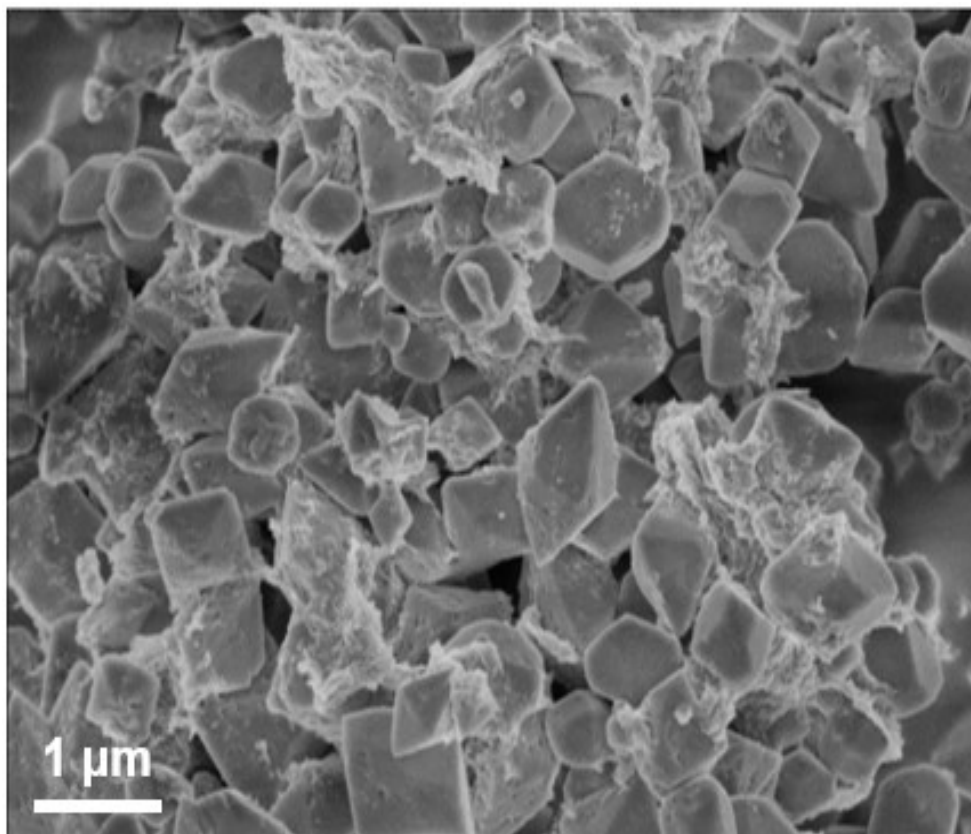

1

2

Figure S2. SEM spectra of NH<sub>2</sub>-MIL-125(Ti).

3



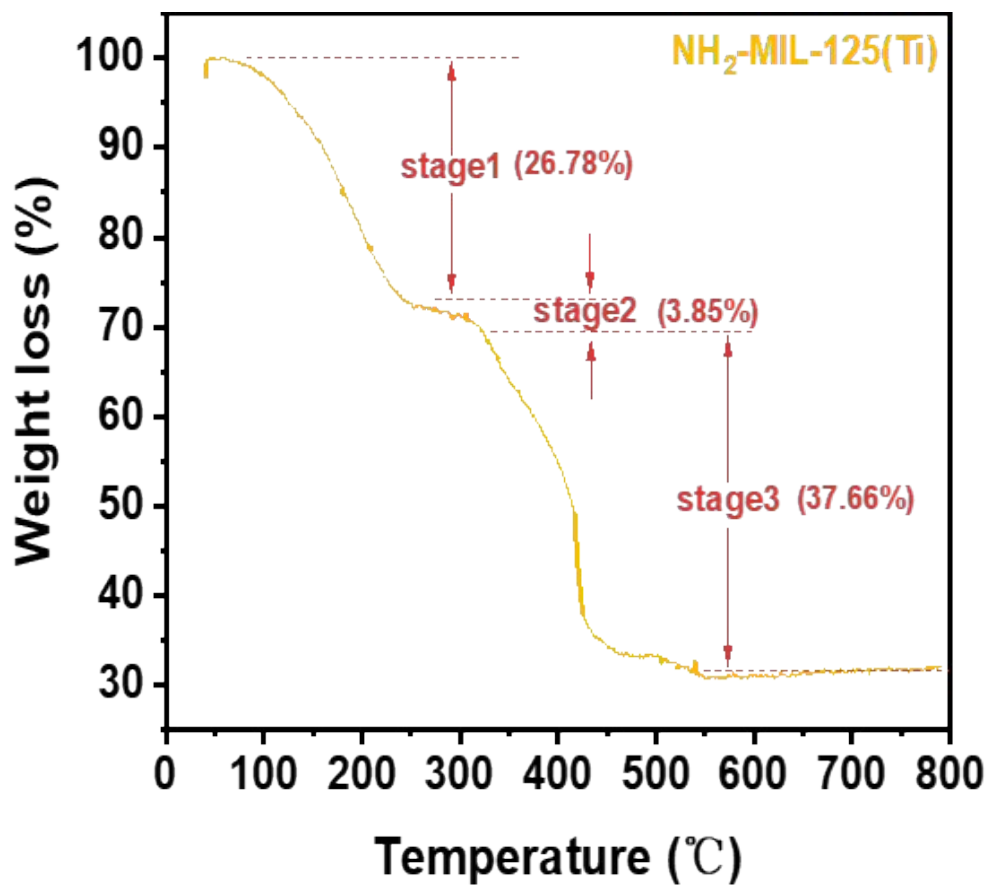

1

2

Figure S3. TGA curve of NH<sub>2</sub>-MIL-125(Ti) in air atmosphere.

3

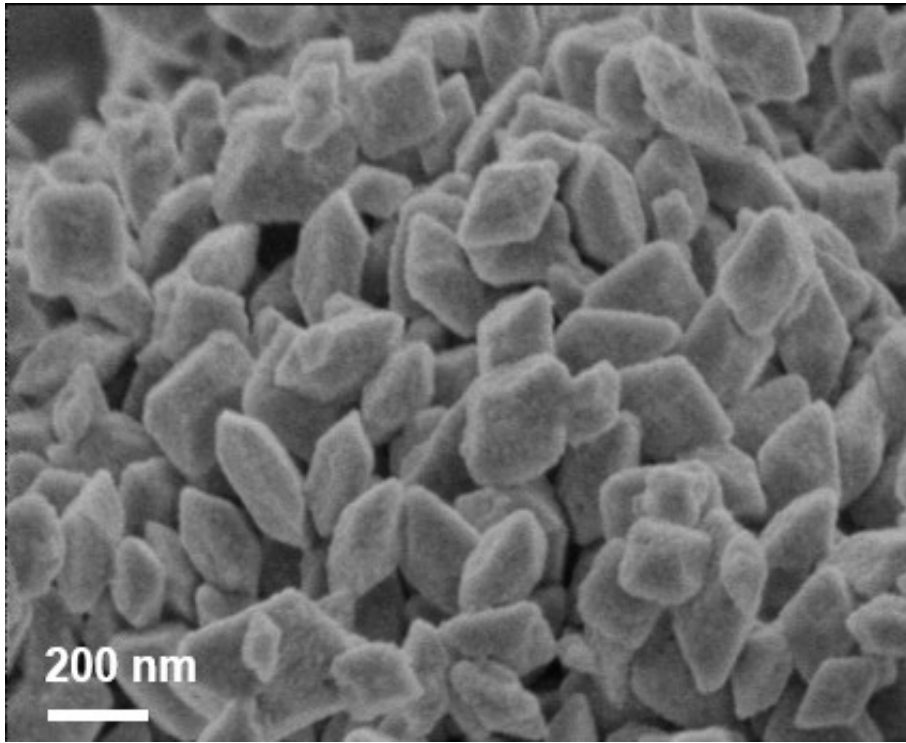

1

Figure S4. SEM spectra of N/TiO<sub>2</sub>.

2

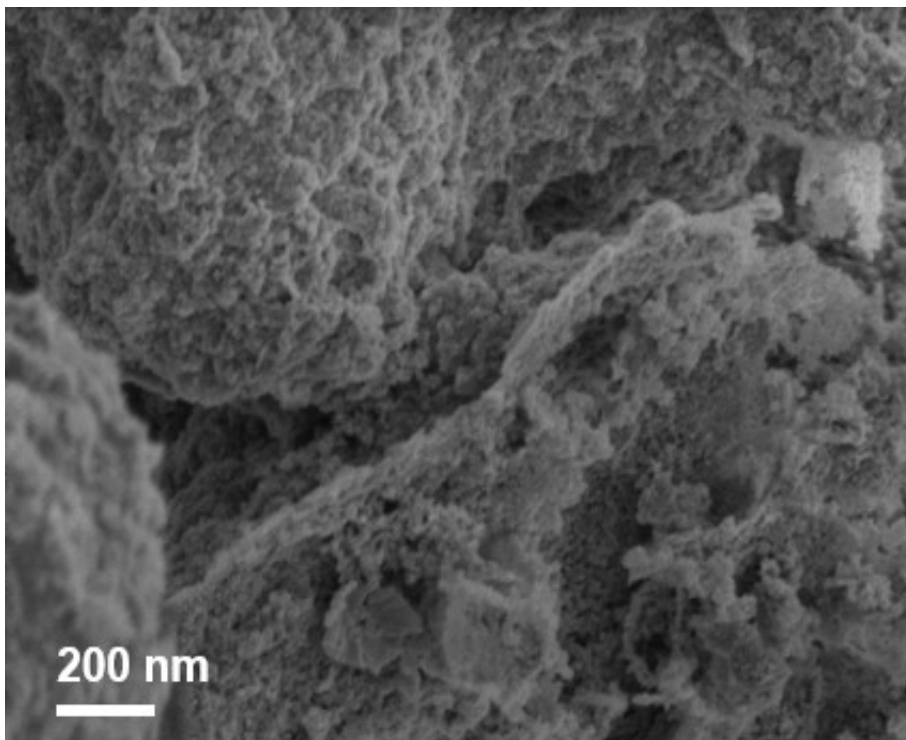

3

Figure S5. SEM spectra of 1.2-N/TiO<sub>2</sub>.

4

5

---

1

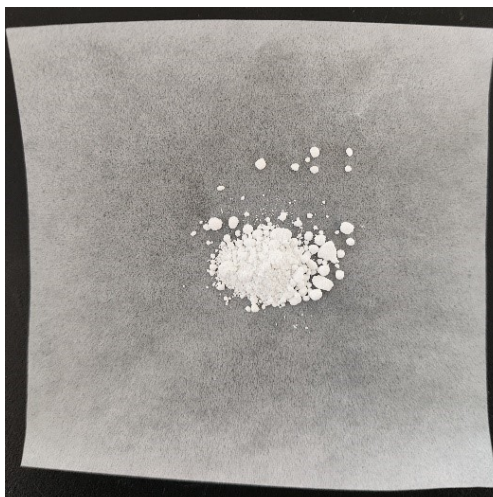

2

Figure S 6.  $\text{TiO}_2$  powder.

3

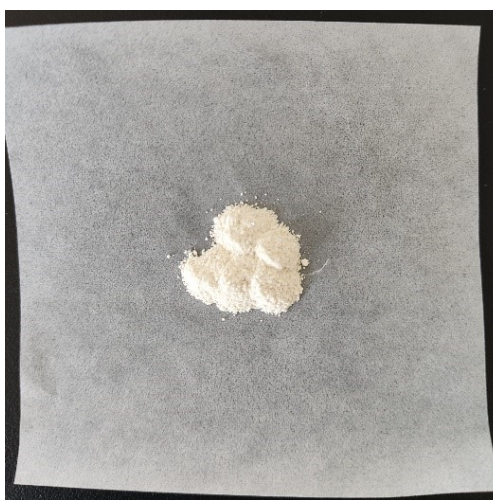

4

Figure S7.  $\text{N/TiO}_2$  powder.

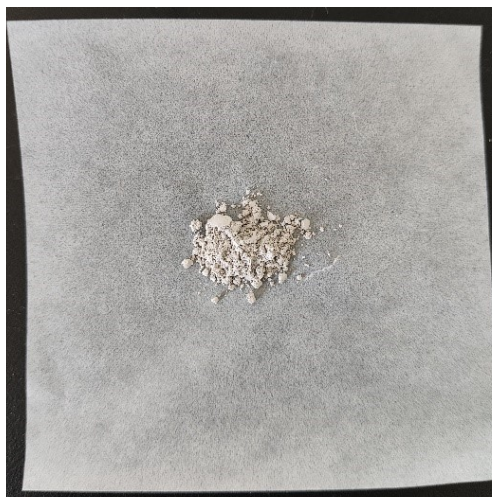

1

2

Figure S8. 1.2-N/TiO<sub>2</sub> powder.

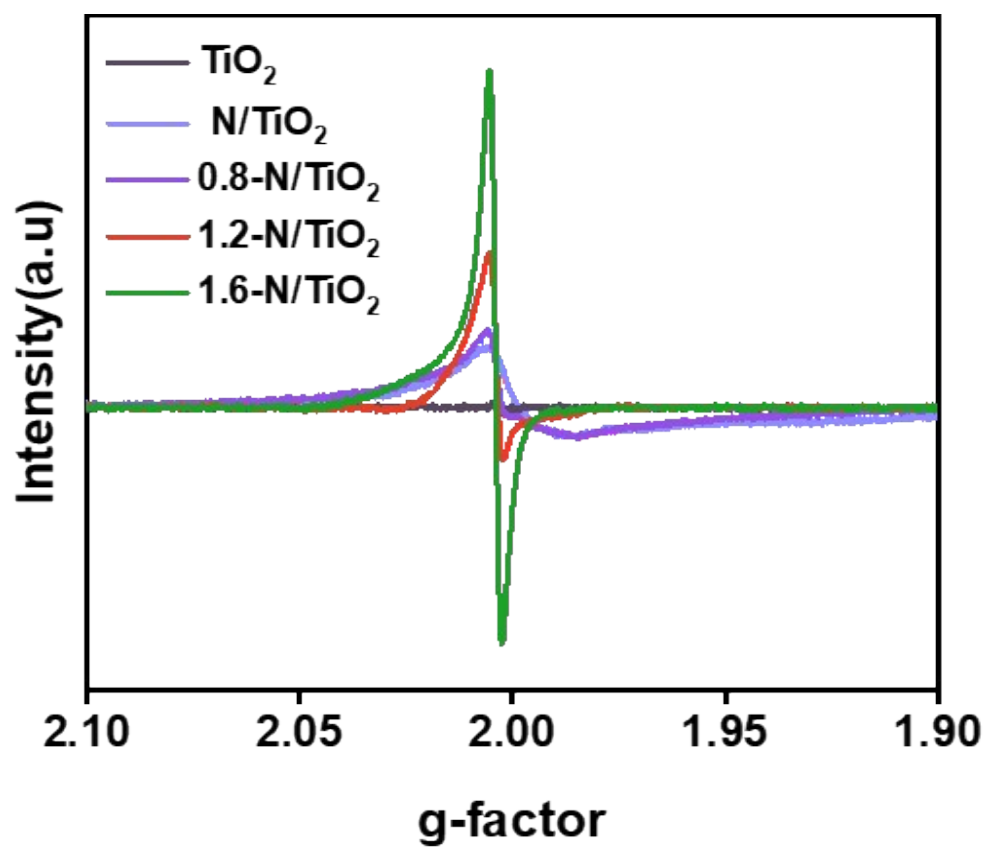

1

2 Figure S9. EPR spectra of  $\text{TiO}_2$ ,  $\text{N/TiO}_2$ ,  $0.8\text{-N/TiO}_2$ ,  $1.2\text{-N/TiO}_2$  and  $1.6\text{-N/TiO}_2$ .

3

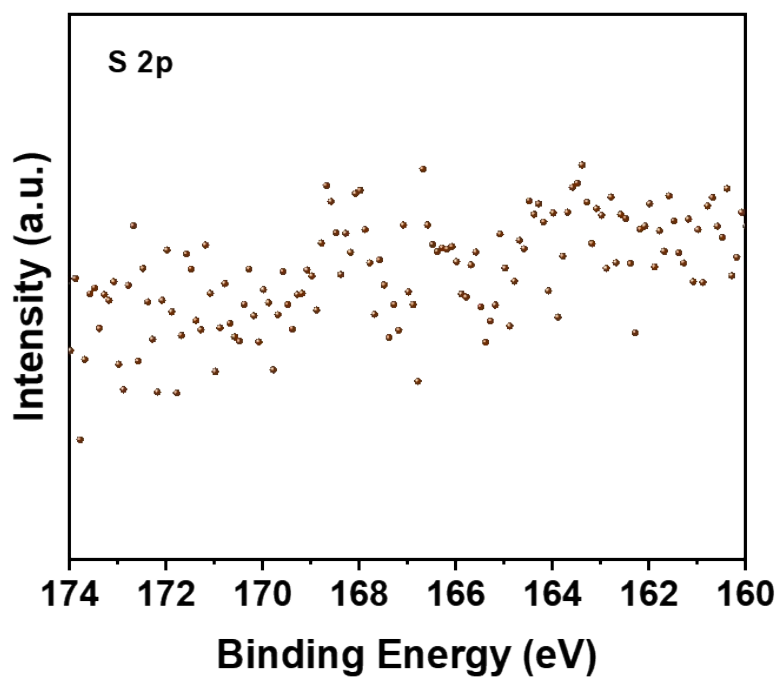

1  
2  
3  
4

Figure S 10. XPS spectra of S 2p of 1.2-N/TiO<sub>2</sub>.

1

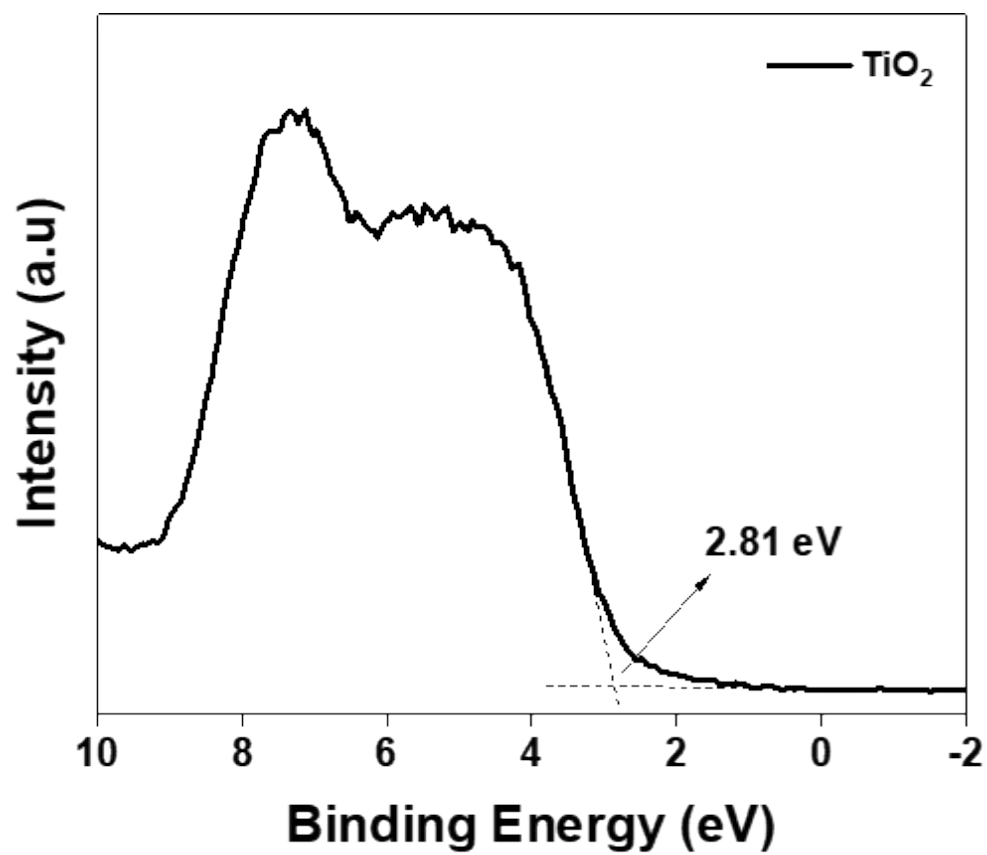

2

3

4

Figure S11. valence band XPS spectrum of TiO<sub>2</sub>.

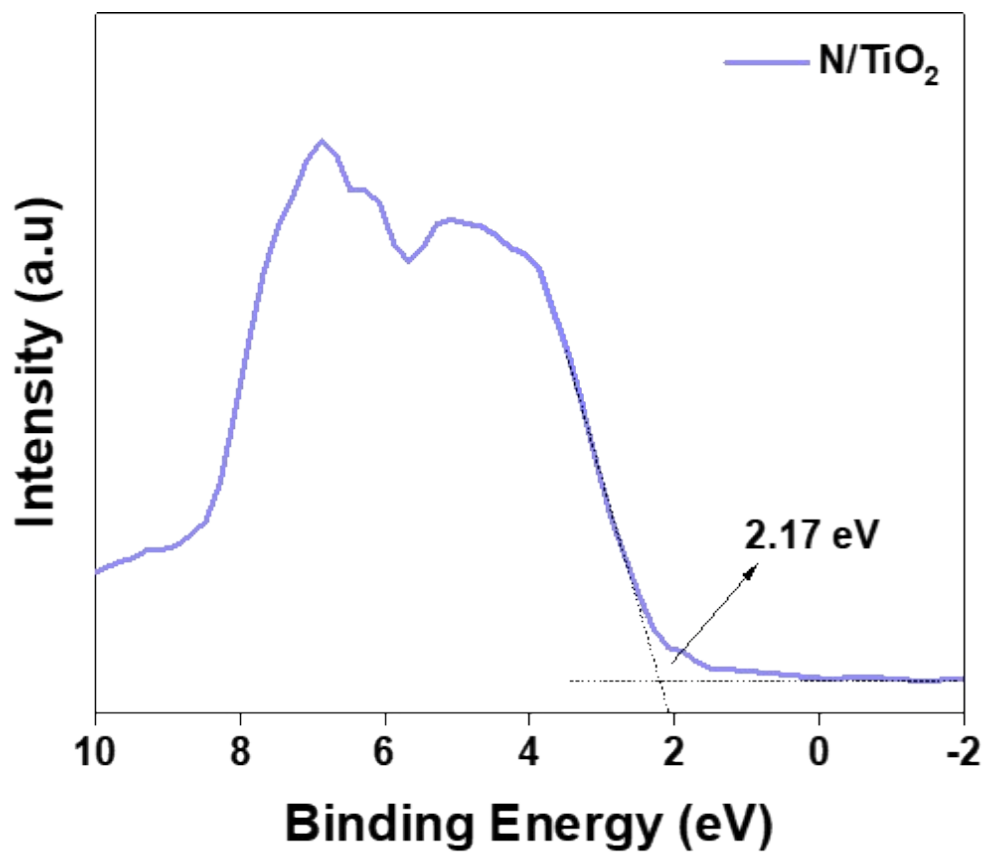

1  
2  
3

Figure S12. valence band XPS spectrum of N/TiO<sub>2</sub>.



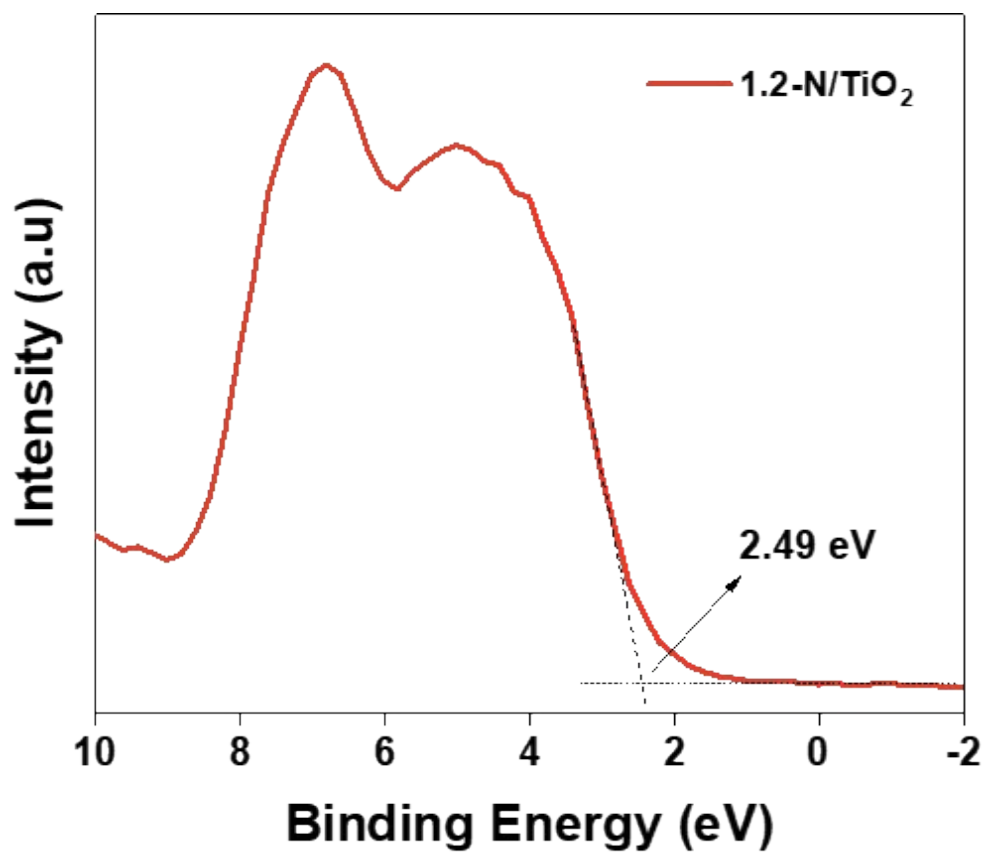

1  
2  
3

Figure S13. valence band XPS spectrum of 1.2-N/TiO<sub>2</sub>.

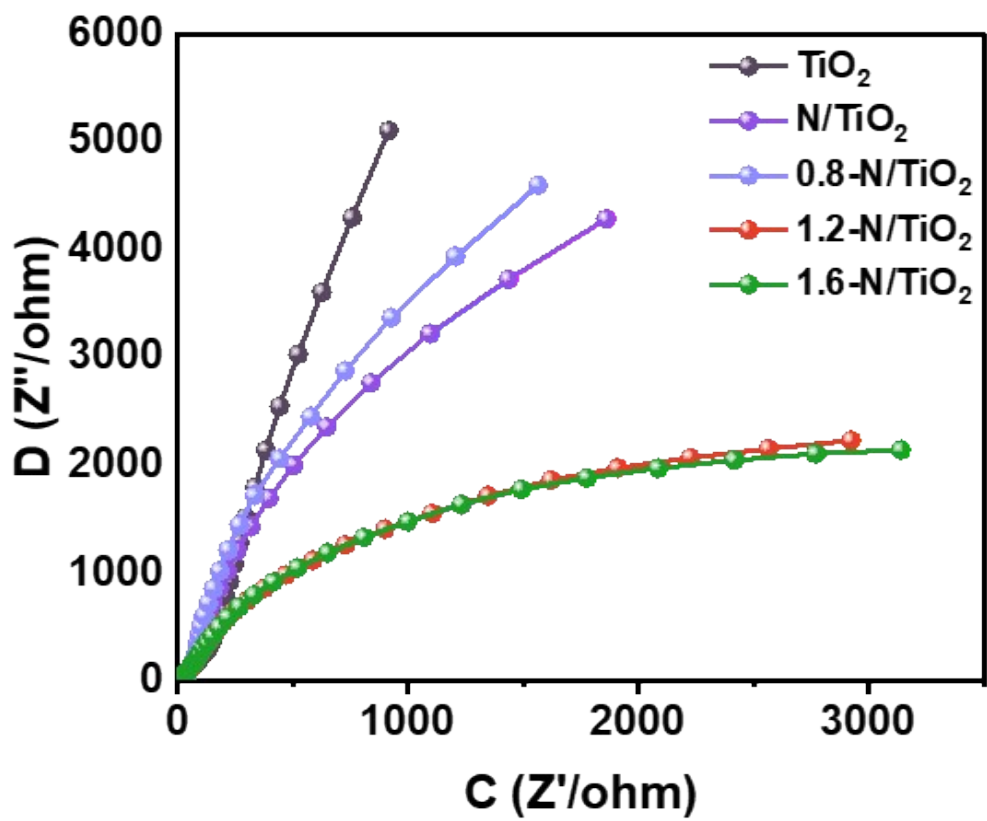

1

2 Figure S14. EIS curves of TiO<sub>2</sub>, N/TiO<sub>2</sub>, 0.8-N/TiO<sub>2</sub>, 1.2-N/TiO<sub>2</sub> and 1.6-N/TiO<sub>2</sub>.

3

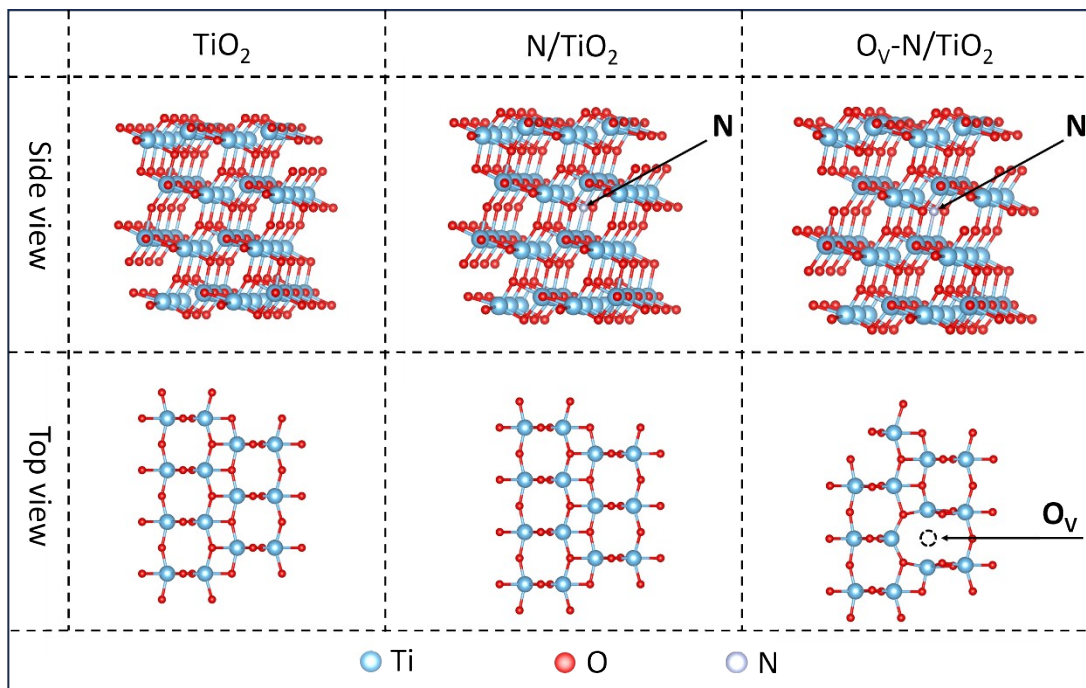

1  
2  
3

Figure S15. Model structures for pristine  $\text{TiO}_2$ ,  $\text{N/TiO}_2$  and  $\text{N/TiO}_2\text{-O}_V$ .

1 **Table S1** The compositions of as-prepared TiO<sub>2</sub> nanocrystals derived from XPS  
2 analyses.

| Sample                 | Composition (at%) |                |                |                |                |
|------------------------|-------------------|----------------|----------------|----------------|----------------|
|                        | Ti <sup>a</sup>   | O <sup>b</sup> | O <sup>c</sup> | N <sup>d</sup> | C <sup>e</sup> |
| N/TiO <sub>2</sub>     | 23.43             | 46.38          | 4.37           | 0.81           | 25.01          |
| 1.2-N/TiO <sub>2</sub> | 24.43             | 42.03          | 8.23           | 0.61           | 24.85          |

3 <sup>a</sup> Ti at% from the Ti - O bond.

4 <sup>b</sup> O at% from the Ti - O bond.

5 <sup>c</sup> O at% from the adsorbed oxygen.

6 <sup>d</sup> N at% from the N - Ti - O bond.

7 <sup>e</sup> C at% from the C - C and C - O bond.

8

9

10

---

1 **Table S2** Fitting parameters of the time-resolved photoluminescence decay curves of  
2 samples, by the bi-exponential kinetic function.

| <b>Sample</b>          | <b>A<sub>1</sub>(%)</b> | <b>τ<sub>1</sub> (ns)</b> | <b>A<sub>2</sub>(%)</b> | <b>τ<sub>2</sub> (ns)</b> | <b>τ<sub>ave</sub> (ns)</b> |
|------------------------|-------------------------|---------------------------|-------------------------|---------------------------|-----------------------------|
| 1.6-N/TiO <sub>2</sub> | 16.59                   | 1.36                      | 0.21                    | 7.34                      | 1.73                        |
| 1.2-N/TiO <sub>2</sub> | 0.25                    | 2.36                      | 1.17                    | 14.86                     | 14.45                       |
| 0.8-N/TiO <sub>2</sub> | 7.53                    | 1.5                       | 0.61                    | 14.51                     | 7.39                        |
| N/TiO <sub>2</sub>     | 11.75                   | 1.39                      | 0.2                     | 5.4                       | 1.28                        |
| TiO <sub>2</sub>       | 4.42                    | 1.04                      | 0.17                    | 5.78                      | 1.42                        |

3 The t for each sample was calculated using the following equation:

4

5

6

$$\tau_{\text{ave}} = (A_1\tau_1^2 + A_2\tau_2^2) / (A_1\tau_1 + A_2\tau_2) \quad (2)$$

1  
2

### 3 **References**

- 4 1. Y. X. Zhao, Y. F. Zhao, R. Shi, B. Wang, G. I. N. Waterhouse, L. Z. Wu, C. H.  
5 Tung and T. R. Zhang, *Adv. Mater.*, 2019, **31**, 9.
- 6 2. Q. Gao, L. Sun, Z. H. Wang and J. G. Deng, *Chin. Chem. Lett.*, 2024, **35**, 4.
- 7 3. T. P. Lv, J. H. Zhao, M. P. Chen, K. Y. Shen, D. M. Zhang, J. Zhang, G. L. Zhang  
8 and Q. J. Liu, *Materials*, 2018, **11**, 12.
- 9 4. H. L. Gao, J. M. Liu, J. Zhang, Z. Q. Zhu, G. L. Zhang and Q. J. Liu, *Chin. J. Catal.*,  
10 2017, **38**, 1688-1696.
- 11 5. Y. F. Zhao, H. Zhou, X. R. Zhu, Y. T. Qu, C. Xiong, Z. G. Xue, Q. W. Zhang, X.  
12 K. Liu, F. Y. Zhou, X. M. Mou, W. Y. Wang, M. Chen, Y. Xiong, X. G. Lin, Y.  
13 Lin, W. X. Chen, H. J. Wane, Z. Jiang, L. R. Zheng, T. Yao, J. C. Dong, S. Q.  
14 Wei, W. X. Huang, L. Gu, J. Luo, Y. F. Li and Y. E. Wu, *Nat. Catal.*, 2021, **4**,  
15 134-143.
- 16 6. V. Milman, B. Winkler, J. A. White, C. J. Pickard, M. C. Payne, E. V.  
17 Akhmatkaya and R. H. Nobes, *International Journal of Quantum Chemistry*,  
18 2000, **77**, 895-910.
- 19 7. M. Ernzerhof and J. P. Perdew, *The Journal of Chemical Physics*, 1998, **109**, 3313-  
20 3320.
- 21 8. G. Kresse and D. Joubert, *Physical Review B*, 1999, **59**, 1758-1775.
- 22 9. S. Froyen, *Phys Rev B Condens Matter*, 1989, **39**, 3168-3172.
- 23 10. B. Hammer and J. K. Norskov, *Surface Science*, 1995, **343**, 211-220.
- 24 11. V. Wang, N. Xu, J.-C. Liu, G. Tang and W.-T. Geng, *Computer Physics*  
25 *Communications*, 2021, **267**.
- 26
